# Supplementary material for: Socio-demographic characteristics associated with COVID-19 vaccination uptake in Switzerland: longitudinal analysis of the CoMix study
Source: bioRxiv or medRxiv preprint supplement (doi:10.1101/2023.03.13.23287183), 2023-06-02
Supplement: Supplementary file [file media-1.pdf]

**Supplement**

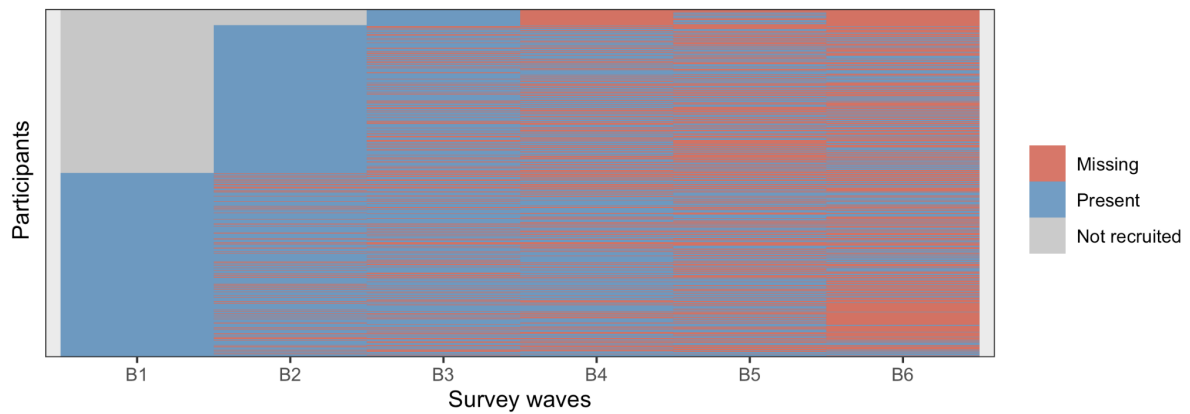

**Supplementary Figure 1:** Participants in the six survey waves of the CoMix study in Switzerland.

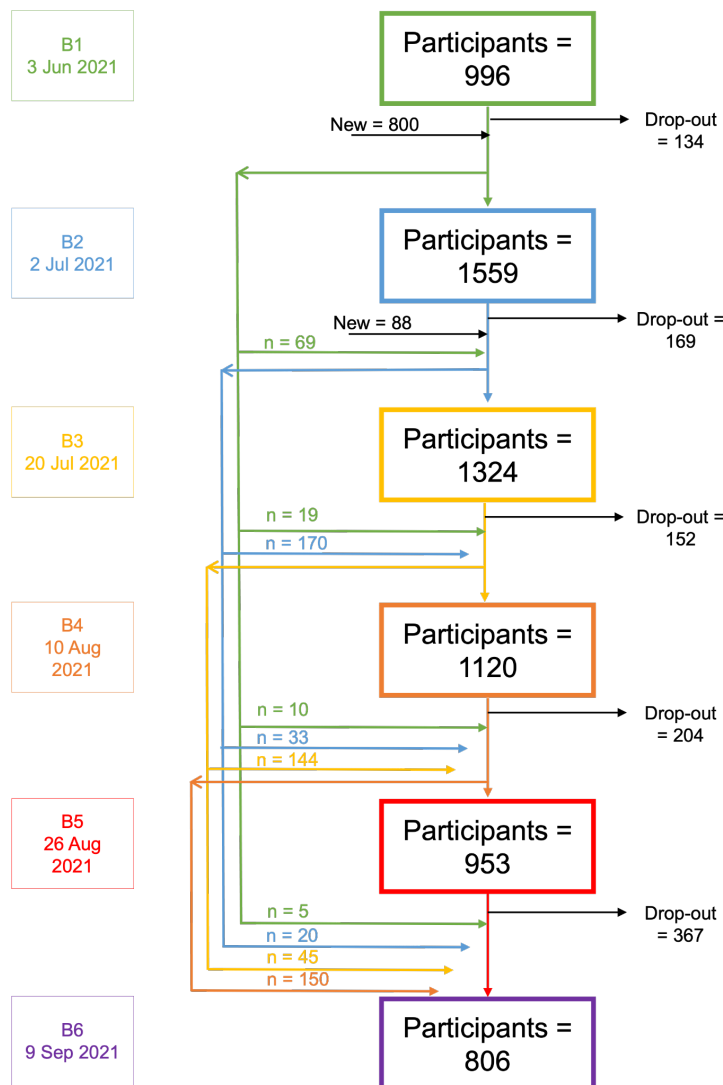

**Supplementary Figure 2:** Flow chart of the participants in the six survey waves of the CoMix study in Switzerland.

**Supplementary Table 1:** Comparison of key characteristics of study participants with the Swiss population. The income of study participants is the household income, whereas the income for the Swiss population corresponds to the individual income from full and part-time employees.

| Category  | Name                     | Swiss population, n (%) | Study participants, n (%) | Survey wave |             |             |             |             |             |
|-----------|--------------------------|-------------------------|---------------------------|-------------|-------------|-------------|-------------|-------------|-------------|
|           |                          |                         |                           | B1          | B2          | B3          | B4          | B5          | B6          |
| Gender    | Female                   | 4,326,821 (50%)         | 497 (49.9%)               | 761 (48.8%) | 645 (48.7%) | 556 (49.6%) | 452 (47.4%) | 386 (47.9%) | 497 (49.9%) |
|           | Male                     | 4259105                 | 495 (49.7%)               | 792 (50.8%) | 673 (50.8%) | 560 (50%)   | 498 (52.3%) | 418 (51.9%) | 495 (49.7%) |
|           | Other                    |                         | 4 (0.4%)                  | 6 (0.4%)    | 6 (0.5%)    | 4 (0.4%)    | 3 (0.3%)    | 2 (0.2%)    | 4 (0.4%)    |
| Age group | [18,30)                  | 1,170,597 (16.3%)       | 177 (17.8%)               | 275 (17.6%) | 207 (15.6%) | 154 (13.8%) | 138 (14.5%) | 93 (11.5%)  | 177 (17.8%) |
|           | [30,40)                  | 1,239,355 (17.2%)       | 180 (18.1%)               | 304 (19.5%) | 249 (18.8%) | 202 (18%)   | 150 (15.7%) | 156 (19.4%) | 180 (18.1%) |
|           | [40,50)                  | 1,200,424 (16.7%)       | 159 (16%)                 | 247 (15.8%) | 219 (16.5%) | 170 (15.2%) | 160 (16.8%) | 145 (18%)   | 159 (16%)   |
|           | [50,60)                  | 1,304,794 (18.1%)       | 188 (18.9%)               | 309 (19.8%) | 273 (20.6%) | 245 (21.9%) | 194 (20.4%) | 198 (24.6%) | 188 (18.9%) |
|           | [60,70)                  | 1,005,687 (14%)         | 170 (17.1%)               | 251 (16.1%) | 222 (16.8%) | 202 (18%)   | 179 (18.8%) | 135 (16.7%) | 170 (17.1%) |
|           | 70+                      | 1,276,149 (17.7%)       | 122 (12.2%)               | 173 (11.1%) | 154 (11.6%) | 147 (13.1%) | 132 (13.9%) | 79 (9.8%)   | 122 (12.2%) |
|           | Household income, net    | CHF [0-5,000)           | 49.4%*                    | 328 (32.9%) | 493 (31.6%) | 425 (32.1%) | 359 (32.1%) | 309 (32.4%) | 236 (29.3%) |
|           | CHF [5,000-10,000)       | 42.2%*                  | 396 (39.8%)               | 634 (40.7%) | 533 (40.3%) | 445 (39.7%) | 384 (40.3%) | 341 (42.3%) | 396 (39.8%) |
|           | CHF 10,000+              | 7.6%*                   | 124 (12.4%)               | 203 (13%)   | 171 (12.9%) | 139 (12.4%) | 122 (12.8%) | 102 (12.7%) | 124 (12.4%) |
|           | Prefer not to answer     |                         | 148 (14.9%)               | 229 (14.7%) | 195 (14.7%) | 177 (15.8%) | 138 (14.5%) | 127 (15.8%) | 148 (14.9%) |
| Residence | Espace Mittelland        | 1,877,668 (21.9%)       | 216 (21.7%)               | 344 (22.1%) | 286 (21.6%) | 241 (21.5%) | 226 (23.7%) | 176 (21.8%) | 216 (21.7%) |
|           | Zurich                   | 1,537,139 (17.9%)       | 188 (18.9%)               | 291 (18.7%) | 244 (18.4%) | 209 (18.7%) | 190 (19.9%) | 165 (20.5%) | 188 (18.9%) |
|           | Lake Geneva region       | 1,653,240 (19.3%)       | 168 (16.9%)               | 273 (17.5%) | 225 (17%)   | 191 (17.1%) | 165 (17.3%) | 104 (12.9%) | 168 (16.9%) |
|           | Eastern Switzerland      | 1,181,442 (13.8%)       | 141 (14.2%)               | 219 (14%)   | 192 (14.5%) | 161 (14.4%) | 138 (14.5%) | 112 (13.9%) | 141 (14.2%) |
|           | Northwestern Switzerland | 1,170,420 (13.6%)       | 143 (14.4%)               | 219 (14%)   | 186 (14%)   | 155 (13.8%) | 132 (13.9%) | 114 (14.1%) | 143 (14.4%) |
|           | Central Switzerland      | 817,500 (9.5%)          | 96 (9.6%)                 | 148 (9.5%)  | 137 (10.3%) | 108 (9.6%)  | 97 (10.2%)  | 92 (11.4%)  | 96 (9.6%)   |
|           | Ticino                   | 348,517 (4.1%)          | 44 (4.4%)                 | 65 (4.2%)   | 54 (4.1%)   | 55 (4.9%)   | 5 (0.5%)    | 43 (5.3%)   | 44 (4.4%)   |

\*No absolute values available for net income of the Swiss population.

**Supplementary Table 2:** Comparison of different models to study the association of socio-demographic and other factors with COVID-19 vaccination uptake in Switzerland.

| Name                                          | Categories               | Number of participants | Number of answers | Cox proportional hazard model |                        |                  |                      | Poisson regression model |                                       |                  |                                     |                                              |
|-----------------------------------------------|--------------------------|------------------------|-------------------|-------------------------------|------------------------|------------------|----------------------|--------------------------|---------------------------------------|------------------|-------------------------------------|----------------------------------------------|
|                                               |                          |                        |                   | Unadjusted HR                 | Unadjusted weighted HR | Adjusted HR      | Adjusted weighted HR | Unadjusted RR            | Unadjusted RR with age as interaction | Adjusted RR      | Adjusted RR with age as interaction | Adjusted RR with age as interaction (1 June) |
| Survey wave<br>Reference: B1                  | B2                       | 1,143                  | -                 |                               |                        |                  |                      | 1.07 (1.01-1.13)         | -                                     | -                | -                                   | -                                            |
|                                               | B3                       | 511                    | -                 |                               |                        |                  |                      | 0.43 (0.39-0.48)         | -                                     | -                | -                                   | -                                            |
|                                               | B4                       | 356                    | -                 |                               |                        |                  |                      | 0.15 (0.13-0.19)         | -                                     | -                | -                                   | -                                            |
|                                               | B5                       | 277                    | -                 |                               |                        |                  |                      | 0.23 (0.19-0.28)         | -                                     | -                | -                                   | -                                            |
|                                               | B6                       | 230                    | -                 |                               |                        |                  |                      | 0.20 (0.16-0.25)         | -                                     | -                | -                                   | -                                            |
| Age groups (years)<br>Reference: [18,30)      | [30,40)                  | 737                    | 359               | 1.05 (0.87-1.26)              | 1.12 (0.95-1.32)       |                  |                      | 1.07 (0.98-1.16)         | -                                     | -                | -                                   | -                                            |
|                                               | [40,50)                  | 606                    | 314               | 1.09 (0.90-1.32)              | 1.13 (0.95-1.33)       |                  |                      | 1.17 (1.07-1.27)         | -                                     | -                | -                                   | -                                            |
|                                               | [50,60)                  | 676                    | 355               | 1.26 (1.05-1.51)              | 1.29 (1.10-1.52)       |                  |                      | 1.30 (1.20-1.42)         | -                                     | -                | -                                   | -                                            |
|                                               | [60,70)                  | 474                    | 289               | 1.67 (1.39-2.01)              | 1.76 (1.47-2.10)       |                  |                      | 1.62 (1.49-1.77)         | -                                     | -                | -                                   | -                                            |
|                                               | 70+                      | 318                    | 202               | 2.10 (1.72-2.56)              | 2.15 (1.76-2.62)       |                  |                      | 1.85 (1.69-2.03)         | -                                     | -                | -                                   | -                                            |
| Gender<br>Reference: Female                   | Male                     | 1,708                  | 955               | 1.17 (1.05-1.30)              | 1.06 (0.96-1.16)       | 1.07 (0.95-1.20) | 0.97 (0.87-1.08)     | 1.17 (1.11-1.23)         | 1.12 (1.06-1.17)                      | 1.09 (1.04-1.15) | 1.09 (1.04-1.15)                    | 1.11 (1.04-1.19)                             |
|                                               | Others                   | 15                     | 10                | 1.24 (0.64-2.39)              | 0.89 (0.59-1.34)       | 0.86 (0.44-1.69) | 0.89 (0.49-1.61)     | 1.62 (1.20-2.17)         | 1.76 (1.31-2.38)                      | 1.51 (1.12-2.04) | 1.62 (1.20-2.20)                    | 1.78 (1.23-2.57)                             |
| Region<br>Reference: Urban                    | Rural                    | 961                    | 456               | 0.75 (0.66-0.86)              | 0.81 (0.72-0.91)       | 0.89 (0.77-1.02) | 0.86 (0.76-0.98)     | 0.75 (0.71-0.80)         | 0.79 (0.74-0.84)                      | 0.84 (0.79-0.90) | 0.85 (0.80-0.90)                    | 0.85 (0.78-0.92)                             |
| Swiss regions<br>Reference: Espace Mittelland | Zurich                   | 615                    | 351               | 1.22 (1.03-1.44)              | 1.13 (0.98-1.31)       | 1.23 (1.03-1.47) | 1.09 (0.93-1.28)     | 1.23 (1.14-1.33)         | 1.19 (1.10-1.29)                      | 1.10 (1.02-1.20) | 1.11 (1.02-1.20)                    | 1.12 (1.01-1.25)                             |
|                                               | Lake Geneva region       | 590                    | 337               | 1.12 (0.94-1.33)              | 1.06 (0.92-1.23)       | 1.02 (0.86-1.22) | 1.02 (0.87-1.19)     | 1.17 (1.08-1.27)         | 1.13 (1.05-1.23)                      | 1.06 (0.98-1.15) | 1.06 (0.98-1.15)                    | 1.05 (0.95-1.16)                             |
|                                               | Eastern Switzerland      | 501                    | 263               | 1.09 (0.91-1.32)              | 1.05 (0.89-1.23)       | 1.14 (0.95-1.38) | 1.12 (0.95-1.33)     | 1.10 (1.01-1.20)         | 1.09 (1.00-1.19)                      | 1.10 (1.01-1.20) | 1.09 (1.00-1.18)                    | 1.09 (0.98-1.22)                             |
|                                               | Northwestern Switzerland | 262                    | 262               | 1.11 (0.92-1.34)              | 1.08 (0.92-1.27)       | 1.28 (1.05-1.55) | 1.17 (0.99-1.39)     | 1.07 (0.98-1.16)         | 1.08 (0.99-1.17)                      | 1.08 (0.99-1.18) | 1.07 (0.98-1.17)                    | 1.09 (0.97-1.22)                             |
|                                               | Central Switzerland      | 352                    | 182               | 1.07 (0.87-1.32)              | 0.97 (0.80-1.17)       | 1.23 (0.99-1.52) | 1.07 (0.87-1.31)     | 1.05 (0.95-1.16)         | 1.11 (1.01-1.23)                      | 1.18 (1.07-1.30) | 1.16 (1.05-1.28)                    | 1.20 (1.06-1.36)                             |
|                                               | Ticino                   | 140                    | 82                | 1.29 (0.97-1.72)              | 1.49 (1.11-1.99)       | 1.50 (1.12-2.02) | 1.66 (1.20-2.29)     | 1.16 (1.02-1.32)         | 1.16 (1.02-1.33)                      | 1.14 (1.00-1.30) | 1.15 (1.01-1.31)                    | 1.18 (1.00-1.40)                             |
| Country of birth<br>Reference: Switzerland    | EU                       | 450                    | 249               | 1.10 (0.93-1.29)              | 1.04 (0.91-1.19)       | 1.09 (0.92-1.29) | 1.07 (0.92-1.24)     | 1.05 (0.98-1.13)         | 1.02 (0.94-1.10)                      | 0.97 (0.90-1.04) | 0.96 (0.89-1.04)                    | 0.97 (0.88-1.07)                             |
|                                               | Non-EU                   | 283                    | 156               | 1.11 (0.91-1.35)              | 1.11 (0.94-1.30)       | 1.03 (0.84-1.25) | 1.06 (0.88-1.27)     | 1.06 (0.97-1.16)         | 1.01 (0.93-1.11)                      | 0.96 (0.88-1.05) | 0.98 (0.89-1.07)                    | 1.01 (0.90-1.13)                             |

|                                                           |                                    |            |            |                  |                  |                  |                  |                  |                  |                  |                  |                  |
|-----------------------------------------------------------|------------------------------------|------------|------------|------------------|------------------|------------------|------------------|------------------|------------------|------------------|------------------|------------------|
|                                                           | Unknown                            | 235        | 147        | 1.18 (0.97-1.45) | 1.01 (0.81-1.26) | 1.10 (0.89-1.36) | 1.00 (0.79-1.25) | 1.18 (1.08-1.29) | 1.03 (0.94-1.13) | 1.06 (0.97-1.16) | 1.06 (0.97-1.17) | 1.10 (0.97-1.24) |
| Education level<br>Reference: Lowest level                | Middle level of education          | 1,225      | 639        | 1.08 (0.95-1.22) | 1.09 (0.97-1.22) | 1.00 (0.88-1.14) | 1.03 (0.91-1.16) | 1.06 (1.00-1.12) | 1.06 (1.00-1.13) | 1.01 (0.95-1.08) | 1.01 (0.95-1.07) | 0.99 (0.92-1.07) |
|                                                           | Highest level of education         | 714        | 439        | 1.41 (1.23-1.61) | 1.23 (1.09-1.37) | 1.26 (1.08-1.46) | 1.18 (1.04-1.35) | 1.39 (1.31-1.48) | 1.35 (1.27-1.43) | 1.18 (1.10-1.26) | 1.18 (1.10-1.27) | 1.19 (1.09-1.30) |
| Employment status<br>Reference: Employed                  | Unemployed                         | 214        | 110        | 0.88 (0.69-1.13) | 0.96 (0.76-1.21) | 0.89 (0.69-1.15) | 0.96 (0.74-1.23) | 0.86 (0.77-0.96) | 0.83 (0.74-0.93) | 0.86 (0.77-0.97) | 0.86 (0.76-0.97) | 0.88 (0.76-1.03) |
|                                                           | Student/Pupil                      | 192        | 116        | 1.23 (0.98-1.54) | 1.03 (0.85-1.25) | 1.55 (1.17-2.05) | 1.25 (0.96-1.63) | 1.13 (1.02-1.26) | 1.38 (1.22-1.56) | 1.26 (1.11-1.43) | 1.33 (1.17-1.51) | 1.35 (1.15-1.58) |
|                                                           | Full-time parent, homemaker        | 164        | 75         | 0.73 (0.54-0.99) | 0.76 (0.59-0.98) | 0.95 (0.69-1.32) | 0.83 (0.64-1.08) | 0.77 (0.67-0.89) | 0.80 (0.70-0.92) | 0.96 (0.83-1.10) | 0.95 (0.82-1.10) | 0.97 (0.81-1.16) |
|                                                           | Retired                            | 607        | 377        | 1.66 (1.45-1.89) | 1.64 (1.44-1.85) | 1.20 (0.95-1.51) | 1.15 (0.93-1.42) | 1.46 (1.38-1.55) | 1.01 (0.91-1.12) | 1.05 (0.95-1.17) | 1.05 (0.94-1.16) | 1.08 (0.94-1.24) |
|                                                           | Another unemployed situation       | 92         | 44         | 0.85 (0.58-1.26) | 1.06 (0.77-1.47) | 0.96 (0.64-1.44) | 1.27 (0.89-1.80) | 0.85 (0.71-1.01) | 0.82 (0.69-0.98) | 0.92 (0.77-1.10) | 0.90 (0.75-1.07) | 0.80 (0.63-1.03) |
| Household income, net<br>Reference: [0-5,000) CHF         | [5,000-10,000) CHF                 | 1,403      | 762        | 1.19 (1.04-1.36) | 1.13 (1.00-1.27) | 1.25 (1.08-1.44) | 1.23 (1.08-1.41) | 1.18 (1.11-1.25) | 1.21 (1.14-1.28) | 1.15 (1.08-1.23) | 1.15 (1.08-1.23) | 1.14 (1.04-1.24) |
|                                                           | 10,000+ CHF                        | 387        | 248        | 1.49 (1.26-1.77) | 1.23 (1.06-1.42) | 1.42 (1.17-1.73) | 1.26 (1.06-1.50) | 1.50 (1.39-1.62) | 1.47 (1.36-1.59) | 1.33 (1.21-1.45) | 1.34 (1.23-1.46) | 1.36 (1.22-1.53) |
|                                                           | Preferred not to answer            | 529        | 281        | 1.16 (0.98-1.38) | 1.14 (0.97-1.33) | 1.14 (0.95-1.36) | 1.13 (0.96-1.33) | 1.17 (1.08-1.27) | 1.16 (1.07-1.25) | 1.14 (1.06-1.24) | 1.13 (1.04-1.23) | 1.15 (1.03-1.27) |
|                                                           | Household size                     | 2 (1 - 10) | 2 (1 - 10) | 0.96 (0.92-1.00) | 0.95 (0.91-0.98) | 0.95 (0.89-1.01) | 0.97 (0.92-1.02) | 0.97 (0.95-0.98) | 1.02 (0.99-1.04) | 0.96 (0.94-0.99) | 0.96 (0.94-0.99) | 0.97 (0.94-1.01) |
| Vulnerability<br>Reference: No person in a risk group     | One or more person in a risk group | 944        | 578        | 1.33 (1.19-1.49) | 1.21 (1.10-1.34) | 1.21 (1.07-1.36) | 1.17 (1.05-1.31) | 1.36 (1.30-1.44) | 1.20 (1.13-1.26) | 1.18 (1.11-1.24) | 1.16 (1.10-1.23) | 1.16 (1.08-1.25) |
| Testing for SARS-CoV-2<br>Reference: COVID-19 history     | No confirmed COVID-19 history      | 872        | -          | 0.85 (0.46-1.55) | 1.07 (0.69-1.65) | 0.98 (0.53-1.82) | 1.17 (0.73-1.87) | 0.73 (0.55-0.98) | 0.75 (0.56-1.00) | 0.85 (0.63-1.13) | 0.87 (0.65-1.17) | 0.76 (0.55-1.06) |
|                                                           | Not tested for COVID-19            | 2,557      | -          | 1.72 (0.95-3.11) | 1.69 (1.11-2.57) | 1.96 (1.07-3.59) | 1.78 (1.13-2.82) | 1.09 (0.82-1.44) | 0.87 (0.65-1.15) | 1.02 (0.77-1.37) | 1.06 (0.80-1.42) | 0.96 (0.69-1.32) |
|                                                           | Preferred not to answer            | 56         | -          | 0.96 (0.43-2.15) | 1.01 (0.48-2.11) | 1.59 (0.70-3.61) | 1.33 (0.59-3.01) | 0.58 (0.40-0.85) | 0.55 (0.38-0.81) | 0.74 (0.50-1.09) | 0.76 (0.51-1.12) | 0.61 (0.38-0.98) |
| Number of contacts<br>Reference: [0,3)                    | [3,6)                              | 937        | -          | 1.13 (0.98-1.30) | 1.08 (0.96-1.22) | 1.23 (1.07-1.43) | 1.13 (0.99-1.29) | 1.03 (0.97-1.09) | 1.02 (0.96-1.09) | 1.02 (0.95-1.09) | 1.02 (0.95-1.09) | 1.01 (0.92-1.10) |
|                                                           | 6+                                 | 1,282      | -          | 1.16 (1.02-1.31) | 1.00 (0.89-1.11) | 1.28 (1.10-1.49) | 1.11 (0.97-1.27) | 1.06 (1.00-1.12) | 1.09 (1.03-1.16) | 1.08 (1.01-1.16) | 1.08 (1.01-1.16) | 1.10 (1.01-1.20) |
| Perception of COVID-19 measures<br>Reference: About right | Too lenient                        | 663        | -          | 0.88 (0.77-1.01) | 0.81 (0.73-0.89) | 0.85 (0.74-0.97) | 0.79 (0.70-0.88) | 1.02 (0.96-1.08) | 1.05 (0.99-1.12) | 1.01 (0.95-1.07) | 1.02 (0.96-1.08) | 1.03 (0.95-1.11) |

|  |                         |       |   |                  |                  |                  |                  |                  |                  |                  |                  |                  |
|--|-------------------------|-------|---|------------------|------------------|------------------|------------------|------------------|------------------|------------------|------------------|------------------|
|  | Too strict              | 1,157 | - | 0.32 (0.28-0.37) | 0.49 (0.41-0.57) | 0.33 (0.28-0.39) | 0.50 (0.43-0.59) | 0.44 (0.41-0.47) | 0.55 (0.52-0.59) | 0.56 (0.52-0.60) | 0.56 (0.53-0.61) | 0.52 (0.48-0.57) |
|  | Preferred not to answer | 111   | - | 0.43 (0.29-0.63) | 0.56 (0.40-0.79) | 0.45 (0.31-0.68) | 0.59 (0.41-0.83) | 0.51 (0.43-0.61) | 0.61 (0.51-0.72) | 0.63 (0.53-0.76) | 0.64 (0.53-0.77) | 0.70 (0.56-0.88) |

**Supplementary Table 3: Results from the logistic regression model to study the association of study participants' characteristics with missed survey waves.**

| Category                                                  | Variables                          | Number of participants | Number of observations | Univariable OR (95% CI) | aOR (95% CI) without time varying variables | aOR (95% CI) with time varying variables |
|-----------------------------------------------------------|------------------------------------|------------------------|------------------------|-------------------------|---------------------------------------------|------------------------------------------|
| Age groups (years)<br>Reference: [18,30)                  | [30,40)                            | 357                    | 357                    | 0.94 (0.88-1.00)        | 0.93 (0.87-1.00)                            | 0.94 (0.88-1.00)                         |
|                                                           | [40,50)                            | 306                    | 306                    | 0.90 (0.84-0.96)        | 0.89 (0.83-0.95)                            | 0.90 (0.84-0.96)                         |
|                                                           | [50,60)                            | 363                    | 363                    | 0.84 (0.78-0.90)        | 0.84 (0.78-0.90)                            | 0.84 (0.78-0.90)                         |
|                                                           | [60,70)                            | 289                    | 289                    | 0.90 (0.82-0.98)        | 0.90 (0.82-0.98)                            | 0.90 (0.82-0.98)                         |
|                                                           | 70                                 | 206                    | 206                    | 0.91 (0.82-1.02)        | 0.92 (0.82-1.03)                            | 0.91 (0.82-1.02)                         |
| Gender<br>Reference: Female                               | Male                               | 952                    | 952                    | 0.98 (0.94-1.01)        | 0.98 (0.95-1.02)                            | 0.98 (0.94-1.01)                         |
|                                                           | Others                             | 10                     | 10                     | 1.03 (0.79-1.34)        | 1.04 (0.80-1.34)                            | 1.03 (0.79-1.34)                         |
| Region<br>Reference: Urban                                | Rural                              | 455                    | 455                    | 0.99 (0.94-1.04)        | 0.99 (0.94-1.03)                            | 0.99 (0.94-1.04)                         |
| Swiss regions<br>Reference: Espace Mittelland             | Zurich                             | 351                    | 351                    | 0.99 (0.93-1.05)        | 0.99 (0.93-1.05)                            | 0.99 (0.93-1.05)                         |
|                                                           | Lake Geneva region                 | 335                    | 335                    | 1.08 (1.01-1.14)        | 1.07 (1.01-1.13)                            | 1.08 (1.01-1.14)                         |
|                                                           | Eastern Switzerland                | 263                    | 263                    | 1.01 (0.94-1.07)        | 1.01 (0.94-1.07)                            | 1.01 (0.94-1.07)                         |
|                                                           | Northwestern Switzerland           | 261                    | 261                    | 1.02 (0.95-1.09)        | 1.02 (0.95-1.09)                            | 1.02 (0.95-1.09)                         |
|                                                           | Central Switzerland                | 181                    | 181                    | 0.98 (0.91-1.06)        | 0.99 (0.92-1.06)                            | 0.98 (0.91-1.06)                         |
|                                                           | Ticino                             | 82                     | 82                     | 1.22 (1.10-1.35)        | 1.21 (1.10-1.34)                            | 1.22 (1.10-1.35)                         |
| Country of birth<br>Reference: Switzerland                | EU                                 | 249                    | 249                    | 1.09 (1.03-1.16)        | 1.10 (1.03-1.16)                            | 1.09 (1.03-1.16)                         |
|                                                           | Non-EU                             | 156                    | 156                    | 1.05 (0.98-1.12)        | 1.05 (0.98-1.12)                            | 1.05 (0.98-1.12)                         |
|                                                           | Unknown                            | 146                    | 146                    | 0.98 (0.91-1.06)        | 0.98 (0.91-1.06)                            | 0.98 (0.91-1.06)                         |
| Education level<br>Reference: Lowest level                | Middle level of education          | 637                    | 637                    | 0.98 (0.94-1.03)        | 0.97 (0.93-1.02)                            | 0.98 (0.94-1.03)                         |
|                                                           | Highest level of education         | 439                    | 439                    | 0.99 (0.93-1.04)        | 0.99 (0.94-1.04)                            | 0.99 (0.93-1.04)                         |
| Employment status<br>Reference: Employed                  | Unemployed                         | 109                    | 109                    | 1.00 (0.92-1.09)        | 1.00 (0.92-1.09)                            | 1.00 (0.92-1.09)                         |
|                                                           | Student/Pupil                      | 116                    | 116                    | 1.08 (0.99-1.19)        | 1.09 (0.99-1.20)                            | 1.08 (0.99-1.19)                         |
|                                                           | Full-time parent, homemaker        | 75                     | 75                     | 0.92 (0.83-1.01)        | 0.92 (0.83-1.02)                            | 0.92 (0.83-1.01)                         |
|                                                           | Retired                            | 375                    | 375                    | 1.00 (0.92-1.08)        | 1.00 (0.92-1.09)                            | 1.00 (0.92-1.08)                         |
|                                                           | Another unemployed situation       | 44                     | 44                     | 0.98 (0.86-1.12)        | 0.97 (0.86-1.11)                            | 0.98 (0.86-1.12)                         |
| Household income, net<br>Reference: [0-5,000) CHF         | [5,000-10,000) CHF                 | 760                    | 760                    | 0.98 (0.93-1.03)        | 0.98 (0.93-1.02)                            | 0.98 (0.93-1.03)                         |
|                                                           | 10,000+ CHF                        | 248                    | 248                    | 0.98 (0.92-1.05)        | 0.99 (0.93-1.06)                            | 0.98 (0.92-1.05)                         |
|                                                           | Preferred not to answer            | 278                    | 278                    | 0.97 (0.91-1.03)        | 0.98 (0.92-1.04)                            | 0.97 (0.91-1.03)                         |
|                                                           | Household size                     | 2 (1 - 10)             | 2 (1 - 10)             | 1.02 (1.01-1.04)        | 0.99 (0.98-1.01)                            | 1.02 (1.01-1.04)                         |
| Vulnerability<br>Reference: No person in a risk group     | One or more person in a risk group | 578                    | 578                    | 0.97 (0.93-1.02)        | 0.97 (0.93-1.02)                            | 0.97 (0.93-1.02)                         |
| Testing for SARS-CoV-2<br>Reference: COVID-19 history     | No confirmed COVID-19 history      | -                      | 539                    | 0.96 (0.82-1.11)        | 0.95 (0.91-0.99)                            | 0.96 (0.82-1.11)                         |
|                                                           | Never tested for COVID-19          | -                      | 1,211                  | 0.96 (0.83-1.12)        | 0.94 (0.81-1.09)                            | 0.96 (0.83-1.12)                         |
|                                                           | Preferred not to answer            | -                      | 29                     | 1.00 (0.81-1.24)        | 0.95 (0.81-1.10)                            | 1.00 (0.81-1.24)                         |
| Vaccination status<br>Reference: Not vaccinated           | Vaccinated                         | 1317                   | 1,317                  | 0.74 (0.58-0.94)        | -                                           | 0.98 (0.79-1.21)                         |
| Number of contacts<br>Reference: [0,3)                    | [3,6)                              | -                      | 534                    | 1.12 (0.87-1.43)        | -                                           | 1.02 (0.98-1.07)                         |
|                                                           | 6+                                 | -                      | 596                    | 2.54 (1.92-3.36)        | -                                           | 1.16 (1.10-1.23)                         |
| Perception of COVID-19 measures<br>Reference: About right | Too lenient                        | -                      | 426                    | 1.07 (0.81-1.41)        | -                                           | 1.03 (0.98-1.08)                         |
|                                                           | Too strict                         | -                      | 494                    | 0.90 (0.70-1.16)        | -                                           | 0.97 (0.92-1.01)                         |

|  |            |   |    |                  |   |                  |
|--|------------|---|----|------------------|---|------------------|
|  | Don't know | - | 45 | 1.71 (0.75-3.87) | - | 1.08 (0.94-1.23) |
|--|------------|---|----|------------------|---|------------------|
